# Supplementary material for: Signatures of Discriminative Copy Number Aberrations in 31 Cancer Subtypes
Source: bioRxiv or medRxiv preprint supplement (doi:10.1101/2020.12.18.423278), 2021-04-15
Supplement: Supplementary file [file media-2.pdf]

Merged based on signatures, ■ is left out (less than 50).

| Tissue                                        | Analyzed subtypes                                            | Annotated subtypes                                    | IDCO morphology | Samples |
|-----------------------------------------------|--------------------------------------------------------------|-------------------------------------------------------|-----------------|---------|
| Brain                                         | Glioma, malignant                                            | Glioma, malignant                                     | 9380/3          | 159     |
|                                               |                                                              | Glioblastoma                                          | 9440/3          | 1646    |
|                                               | Astrocytoma                                                  | Astrocytoma                                           | 9400/3          | 160     |
|                                               |                                                              | Astrocytoma, anaplastic                               | 9401/3          | 179     |
|                                               | Oligodendroglioma                                            | Oligodendroglioma                                     | 9450/3          | 221     |
|                                               |                                                              | Oligodendroglioma, anaplastic                         | 9451/3          | 105     |
|                                               | Primitive neuroectodermal tumor                              |                                                       | 9473/3          | 82      |
|                                               | Mixed glioma (Anaplastic oligoastrocytoma, Oligoastrocytoma) |                                                       | 9382/3          | 162     |
|                                               | Ependymoma                                                   | 9391/3                                                | 49              |         |
| Breast                                        | Intraductal carcinoma, noninfiltrating, NOS                  |                                                       | 8500/2          | 82      |
|                                               | Infiltrating duct carcinoma, NOS                             |                                                       | 8500/3          | 5657    |
|                                               | Lobular carcinoma, NOS                                       |                                                       | 8520/3          | 201     |
|                                               |                                                              | Infiltrating duct and lobular carcinoma               | 8522/3          | 28      |
|                                               |                                                              | Infiltrating duct mixed with other types of carcinoma | 8523/3          | 14      |
|                                               |                                                              | Inflammatory carcinoma                                | 8530/3          | 19      |
|                                               |                                                              | Metaplastic carcinoma, NOS                            | 8575/3          | 16      |
|                                               |                                                              | Pleomorphic carcinoma                                 | 8022/3          | 14      |
|                                               |                                                              | Mucinous adenocarcinoma                               | 8480/3          | 15      |
| Intraductal micropapillary carcinoma (8507/2) |                                                              | 8507/3                                                | 43              |         |
| Cerebellum                                    | Medulloblastoma, NOS                                         | Medulloblastoma, NOS                                  | 9470/3          | 1573    |
|                                               |                                                              | Desmoplastic nodular medulloblastoma                  | 9471/3          | 72      |
|                                               |                                                              | Large cell medulloblastoma                            | 9474/3          | 37      |
| Colon                                         | Adenoma, NOS                                                 |                                                       | 8140/0          | 63      |
|                                               | Adenocarcinoma, NOS                                          |                                                       | 8140/3          | 1643    |
|                                               | Adenocarcinoma, intestinal type                              |                                                       | 8144/3          | 53      |
|                                               | Mucinous adenocarcinoma                                      |                                                       | 8480/3          | 62      |
| Kidney                                        | Clear cell adenocarcinoma, NOS                               |                                                       | 8310/3          | 930     |
|                                               | Renal cell carcinoma, NOS                                    |                                                       | 8312/3          | 323     |

| Tissue          | Analyzed subtypes                   | Annotated subtypes                                             | IDCO morphology | Samples |
|-----------------|-------------------------------------|----------------------------------------------------------------|-----------------|---------|
|                 |                                     | Renal cell carcinoma, chromophobe type                         | 8317/3          | 15      |
|                 |                                     | Oxyphilic adenoma                                              | 8290/0          | 17      |
|                 |                                     |                                                                |                 |         |
| <b>Liver</b>    | Hepatocellular carcinoma            |                                                                | 8170/3          | 371     |
|                 |                                     |                                                                |                 |         |
| <b>Lung</b>     | Carcinoma, NOS                      | Carcinoma, NOS                                                 | 8010/3          | 84      |
|                 |                                     | Large cell carcinoma, NOS                                      | 8012/3          | 54      |
|                 | Adenocarcinoma                      | Adenocarcinoma                                                 | 8140/3          | 1103    |
|                 |                                     | Adenocarcinoma with mixed subtypes                             | 8255/3          | 109     |
|                 | Small cell carcinoma, NOS           |                                                                | 8041/3          | 155     |
|                 | Non-small cell carcinoma            |                                                                | 8046/3          | 1725    |
|                 | Squamous cell carcinoma, NOS        |                                                                | 8070/3          | 518     |
|                 |                                     | Squamous cell carcinoma, uncertain                             | 8070/1          | 12      |
|                 | Bronchiolo-alveolar adenocarcinomas | Bronchiolo-alveolar adenocarcinoma, NOS                        | 8250/3          | 24      |
|                 |                                     | Bronchiolo-alveolar carcinoma, non-mucinous                    | 8252/3          | 19      |
|                 |                                     | Bronchiolo-alveolar carcinoma, mixed mucinous and non-mucinous | 8254/3          | 18      |
|                 |                                     | Papillary adenocarcinoma, NOS                                  | 8260/3          | 29      |
|                 |                                     | Mucinous adenocarcinoma                                        | 8480/3          | 14      |
|                 |                                     | Acinar cell carcinoma                                          | 8550/3          | 21      |
|                 |                                     | Adenosquamous carcinoma                                        | 8560/3          | 16      |
|                 |                                     |                                                                |                 |         |
| <b>Ovary</b>    | Carcinoma                           | Carcinoma                                                      | 8010/3          | 761     |
|                 |                                     | Serous carcinoma                                               | 8441/3          | 964     |
|                 |                                     | Serous tumor                                                   | 8442/1          | 45      |
|                 | Mucinous cystadenoma                | Mucinous cystadenoma                                           | 8470/0          | 57      |
|                 |                                     | Mucinous adenoma                                               | 8480/0          | 60      |
|                 | Adenocarcinoma                      |                                                                | 8140/3          | 111     |
|                 |                                     | Clear Cell Adenocarcinoma                                      | 8310/3          | 24      |
|                 | Endometrioid adenocarcinoma         | 8380/3                                                         | 11              |         |
|                 |                                     |                                                                |                 |         |
| <b>Prostate</b> | Adenocarcinoma                      |                                                                | 8140/3          | 916     |
|                 |                                     | Carcinoma, NOS                                                 | 8010/3          | 16      |
|                 |                                     |                                                                |                 |         |
|                 | Malignant melanoma, NOS             | Malignant melanoma, NOS                                        | 8720/3          | 1030    |
|                 |                                     | Nodular melanoma                                               | 8721/3          | 22      |
|                 |                                     | Amelanotic melanoma                                            | 8730/3          | 16      |

| Tissue  | Analyzed subtypes                | Annotated subtypes                                       | IDCO morphology | Samples |
|---------|----------------------------------|----------------------------------------------------------|-----------------|---------|
| Skin    |                                  | Pigmented dermatofibrosarcoma protuberans (Bednar tumor) | 8833/3          | 11      |
|         |                                  | Mycosis fungoides (Pagetoid reticulosis)                 | 9700/3          | 32      |
|         |                                  | Epidermoid carcinoma (Squamous cell carcinoma), NOS      | 8070/3          | 18      |
|         |                                  | Keratinizing (Squamous cell carcinoma)                   | 8071/0          | 11      |
|         |                                  |                                                          |                 |         |
| Stomach | Adenocarcinoma                   |                                                          | 8140/3          | 763     |
|         | Gastrointestinal stromal sarcoma |                                                          | 8936/3          | 175     |
|         | Adenocarcinoma, intestinal type  |                                                          | 8144/3          | 83      |
|         | Carcinoma, diffuse type          |                                                          | 8145/3          | 57      |
|         | Tubular adenocarcinoma           |                                                          | 8211/3          | 82      |
|         |                                  | Mucinous adenocarcinoma                                  | 8480/3          | 21      |
|         |                                  | Signet ring cell carcinoma                               | 8490/3          | 16      |
|         |                                  | Carcinoma                                                | 8010/3          | 19      |
|         |                                  | Adenoma, NOS                                             | 8140/0          | 17      |
|         |                                  | Adenocarcinoma in situ, NOS                              | 8140/2          | 19      |
