# Supplementary material for: Signatures of Discriminative Copy Number Aberrations in 31 Cancer Subtypes
Source: bioRxiv or medRxiv preprint supplement (doi:10.1101/2020.12.18.423278), 2021-04-15
Supplement: Supplementary file [file media-5.pdf]

## Performance on individual sub-types

| Label                                    | Precision | Recall | F1-score |
|------------------------------------------|-----------|--------|----------|
| Breast Intraductal carcinoma             | 0.7200    | 0.7200 | 0.7200   |
| Colon Adenocarcinoma                     | 0.6888    | 0.7363 | 0.7118   |
| Brain Glioma                             | 0.7205    | 0.6784 | 0.6988   |
| Cerebellum Medulloblastoma               | 0.6317    | 0.7743 | 0.6957   |
| Ovary Carcinoma                          | 0.6885    | 0.6535 | 0.6705   |
| Kidney Clear cell adenocarcinoma         | 0.5751    | 0.7957 | 0.6677   |
| Prostate Adenocarcinoma                  | 0.5578    | 0.6145 | 0.5848   |
| Breast Lobular carcinoma                 | 0.4646    | 0.7667 | 0.5786   |
| Colon Adenoma                            | 0.5882    | 0.5263 | 0.5556   |
| Skin Melanoma                            | 0.5912    | 0.5063 | 0.5455   |
| Ovary Mucinous cystadenoma               | 0.4423    | 0.6571 | 0.5287   |
| Liver Hepatocellular carcinoma           | 0.4220    | 0.6577 | 0.5141   |
| Breast Infiltrating duct carcinoma       | 0.5542    | 0.4412 | 0.4913   |
| Lung Squamous cell carcinoma             | 0.4190    | 0.5677 | 0.4822   |
| Stomach Gastrointestinal stromal sarcoma | 0.4265    | 0.5472 | 0.4793   |
| Lung Non-small cell carcinoma            | 0.4729    | 0.4710 | 0.4720   |
| Brain Oligodendroglioma                  | 0.4444    | 0.4848 | 0.4638   |
| Lung Adenocarcinoma                      | 0.5837    | 0.3736 | 0.4556   |
| Stomach Adenocarcinoma                   | 0.6000    | 0.3144 | 0.4126   |
| Lung Small cell carcinoma                | 0.3220    | 0.4130 | 0.3619   |
| Kidney Renal cell carcinoma              | 0.3261    | 0.3093 | 0.3175   |
| Brain Primitive neuroectodermal tumor    | 0.3333    | 0.2903 | 0.3103   |
| Brain Astrocytoma                        | 0.2895    | 0.2157 | 0.2472   |
| Colon Adenocarcinoma intestinal type     | 0.2222    | 0.2500 | 0.2353   |
| Stomach Tubular adenocarcinoma           | 0.2222    | 0.2400 | 0.2308   |
| Ovary Adenocarcinoma                     | 0.2333    | 0.2121 | 0.2222   |
| Stomach Adenocarcinoma intestinal type   | 0.1667    | 0.2400 | 0.1967   |
| Stomach Carcinoma diffuse type           | 0.1471    | 0.2941 | 0.1961   |

| <b>Label</b>                  | <b>Precision</b> | <b>Recall</b> | <b>F1-score</b> |
|-------------------------------|------------------|---------------|-----------------|
| Brain Mixed glioma            | 0.2286           | 0.1633        | 0.1905          |
| Lung Carcinoma                | 0.2500           | 0.1220        | 0.1639          |
| Colon Mucinous adenocarcinoma | 0.1250           | 0.1579        | 0.1395          |

### Performance on individual organs

| <b>Label</b> | <b>Precision</b> | <b>Recall</b> | <b>F1-score</b> |
|--------------|------------------|---------------|-----------------|
| Brain        | 0.7860           | 0.7174        | 0.7502          |
| Lung         | 0.7524           | 0.6948        | 0.7225          |
| Colon        | 0.6894           | 0.7386        | 0.7132          |
| Cerebellum   | 0.6317           | 0.7743        | 0.6957          |
| Ovary        | 0.6809           | 0.6661        | 0.6734          |
| Kidney       | 0.5983           | 0.7606        | 0.6698          |
| Prostate     | 0.5578           | 0.6145        | 0.5848          |
| Breast       | 0.6000           | 0.5345        | 0.5653          |
| Skin         | 0.5912           | 0.5063        | 0.5455          |
| Liver        | 0.4220           | 0.6577        | 0.5141          |
| Stomach      | 0.5228           | 0.4269        | 0.4700          |
